# Supplementary material for: The effect of translocation-induced nuclear reorganization on gene expression
Source: HighWire-hosted journal article supplement (doi:10.1101/gr.103622.109), 2010-03-08
Supplement: Supplementary_online_material-rerevised.pdf [file Supplementary_online_material-rerevised.pdf]

## **Supplementary online material**

### **The Effect of Translocation-Induced Nuclear Re-organization on Gene Expression**

Louise Harewood *et al.*

### **Supplementary Figure S1: Partial ideograms of the translocation chromosomes**

Partial ideograms of chromosomes 11 and 22 in a normal individual showing the two copies of each chromosome **(A)**, a balanced  $t(11;22)(q23;q11)$  translocation carrier **(B)**, showing the normal 11 (11N), the normal 22 (22N), the derivative 11 (der11) and the derivative 22 (der22) chromosomes and an Emanuel syndrome patient partially trisomic for chromosomes 11 and 22 with two normal chromosome 11s, two normal chromosome 22s and a derivative 22 (der22) **(C)**. Red lines mark the location of the breakpoints of the translocation.

**Supplementary Figure S1**

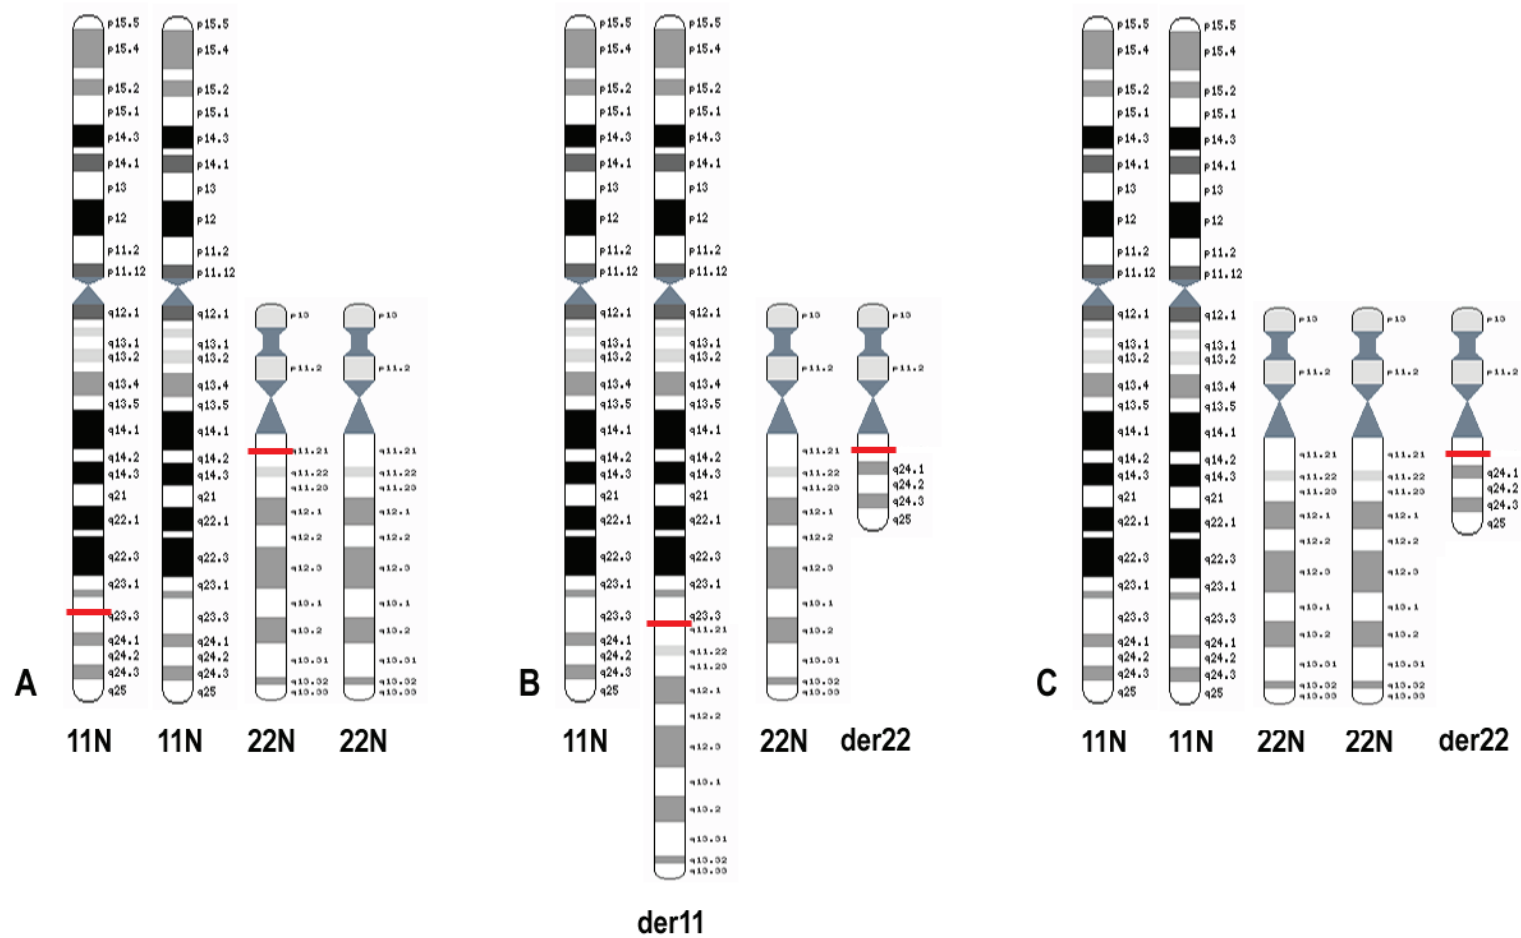

**Supplementary Figure S2: Relative expression levels measured by quantitative PCR**

Averaged normalized relative expression levels of genes measured by quantitative PCR in cell lines from Emanuel syndrome patients (purple; average of n=4 different cell lines), t(11;22) carriers (burgundy; n=5) and controls (yellow; n=5). These genes were shown to present modified expression in Emanuel syndrome patients cells by expression arrays.

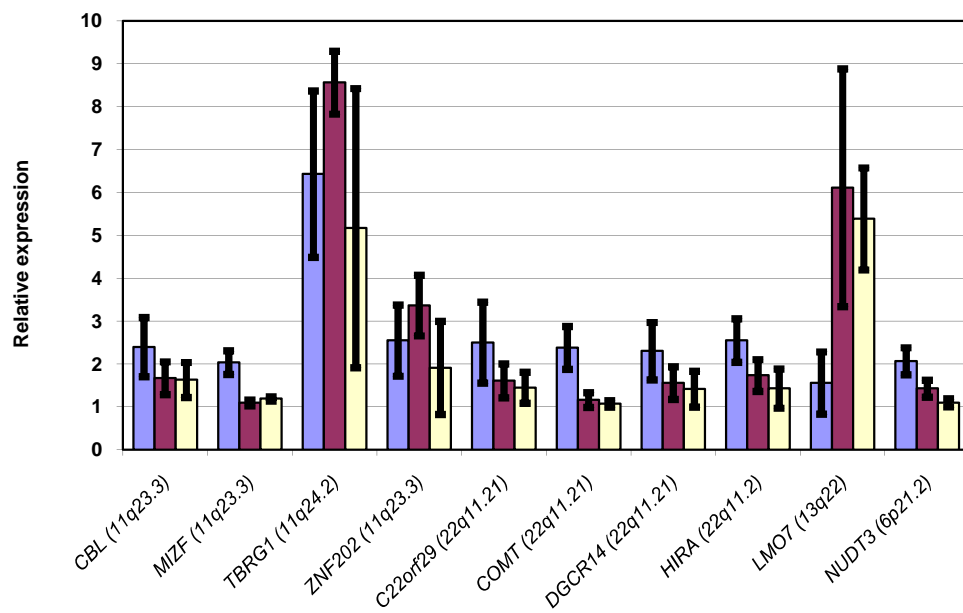

**Supplementary Figure S3: Numbers of differentially expressed transcripts between male and female individuals**

Graph showing the number of differentially expressed transcripts between the male and female cohorts (blue line) identified with variable threshold values and mapping on the autosomal chromosomes. The gray lines and shaded area represent the 50%, 70%, 90% and 95% of the permutation distribution obtained by performing 1000 permutations (6 vs. 16; see the Results and Methods sections for details).

Supplementary Figure S3

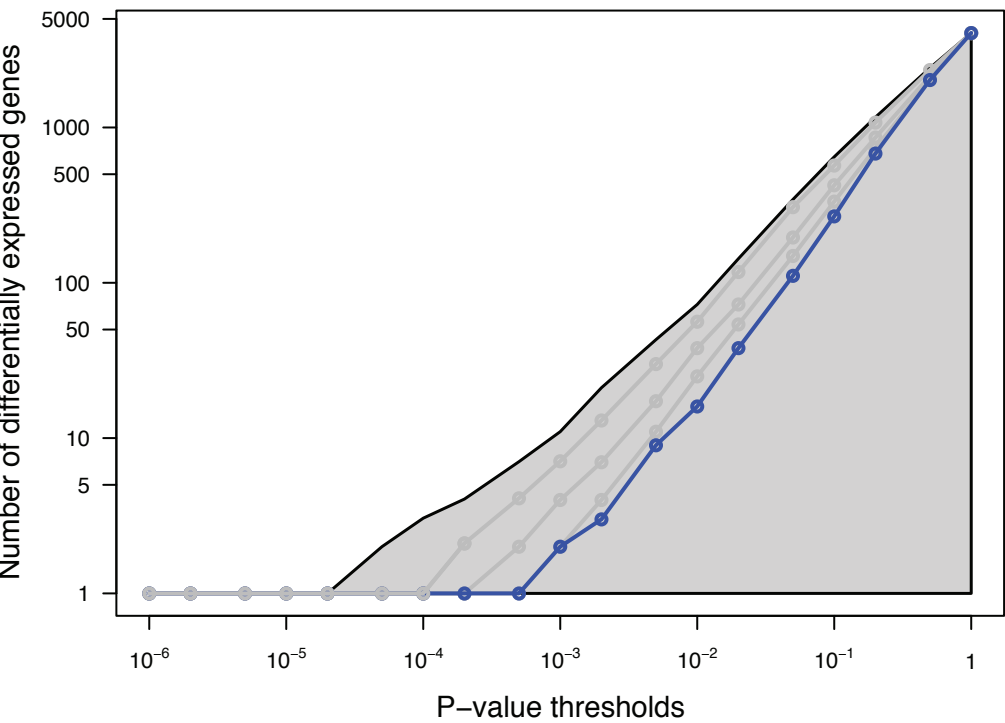

**Supplementary Figure S4: Numbers of differentially expressed transcripts between young and old individuals**

Graph showing the number of differentially expressed transcripts between the male and female cohorts (green line) identified with variable threshold values and mapping on the autosomal chromosomes. The gray lines and shaded area represent the 50%, 70%, 90% and 95% of the permutation distribution obtained by performing 1000 permutations (9 vs. 13; see the Results and Methods sections for details).



Supplementary Figure S4

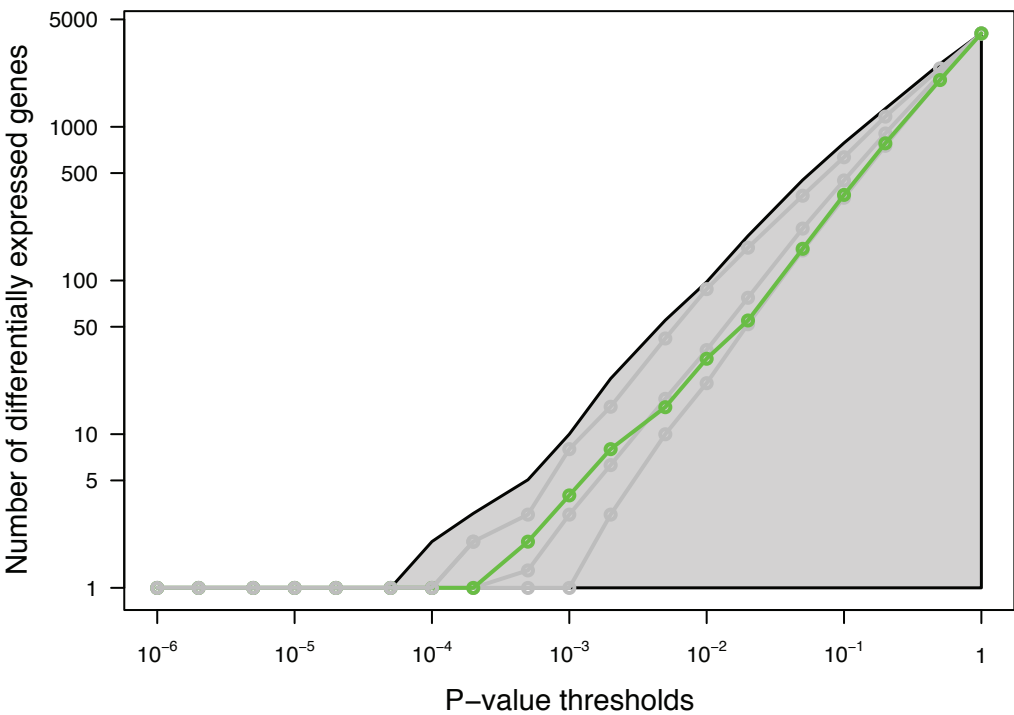

**Supplementary Figure S5: Numbers of differentially expressed transcripts between unbalanced and full-genome complement individuals**

Graph showing the number of differentially expressed transcripts between unbalanced (Emanuel syndrome patients, with partial trisomy 11 and 22) versus full-genome complement cohorts (orange line) identified with variable threshold values and mapping on the autosomal chromosomes. The gray lines and shaded area represent the 50%, 70%, 90% and 95% of the permutation distribution obtained by performing 1000 permutations (4 vs. 22; see the Results and Methods sections for details).

Supplementary Figure S5

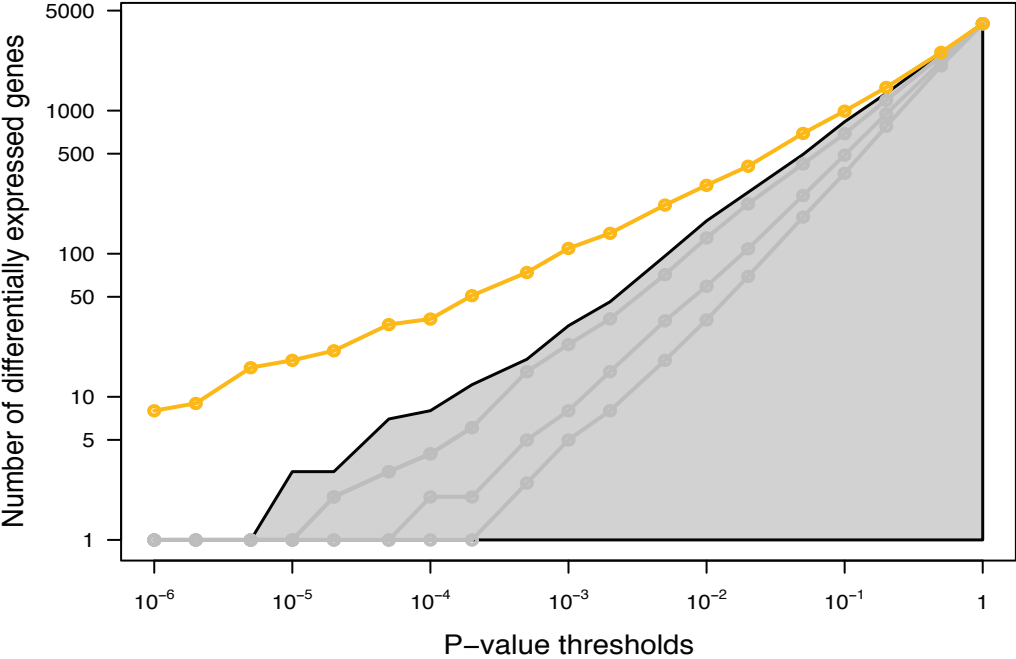

**Supplementary Figure S6: Mapping of t(11;22) differentially expressed genes mapping on HSA11 and HSA22.**

Ensembl Karyoview partial ideograms showing the chromosomal location of the 50 top differentially expressed genes between carriers of the balanced t(11;22) translocation and controls that map either to HSA11 (left panel) or to HSA22 (right panel). The blue lines indicate the translocation breakpoints. Green arrowheads mark the genes showing an increase in expression in cell lines from translocation carriers, whilst red arrowheads depict those showing a decrease. A complete list of these genes and their rankings is presented in Table S5. The mapping of the three chromosome HSA11 or HSA22 genes for which nuclear positioning was assessed by FISH (see text for details) are marked by a blue disk (the fourth, D5, is on chromosome 9q21.32 and is not shown).

Chromosome 11

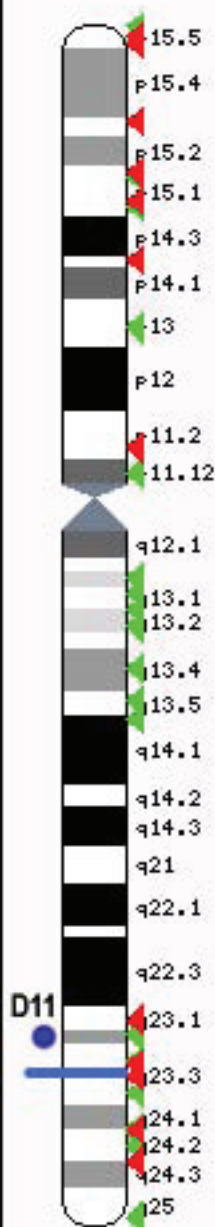

Chromosome 22

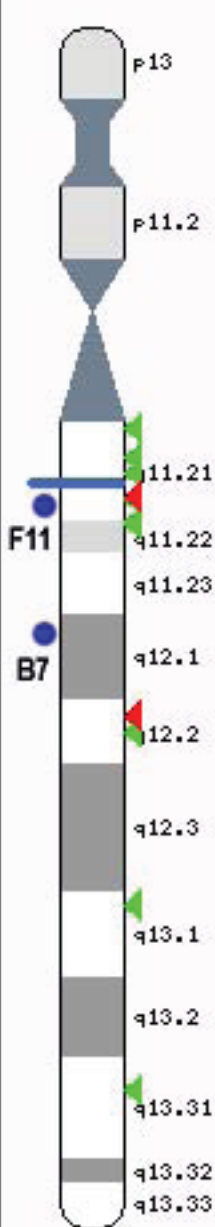

## Supplementary Table S1: List of lymphoblastoid cell lines

**Table S1: List of Lymphoblastoid cell lines**

| Cell line | Karyotype                       | Sex | Age (years) | Source                                  | Cohort     |
|-----------|---------------------------------|-----|-------------|-----------------------------------------|------------|
| FY1197    | 46,XX,t(11;22)(q23;q11)pat      | F   | 22          | ECACC                                   | balanced   |
| GM06229   | 46,XX,t(11;22)(q23;q11)         | F   | 23          | Coriell                                 | balanced   |
| GM06275   | 46,XX,t(11;22)(q23;q11)         | F   | 29          | Coriell                                 | balanced   |
| DD1990    | 46,XX,t(11;22)(q23;q11)         | F   | 38          | ECACC                                   | balanced   |
| 25/93E    | 46,XX,t(11;22)(q23;q11)         | F   | 66          | Elisabeth Blennow, Karolinska Institute | balanced   |
| 27/93E    | 46,XX,t(11;22)(q23;q11)         | F   | 50          | Elisabeth Blennow, Karolinska Institute | balanced   |
| 65/92E    | 46,XX,t(11;22)(q23;q11)         | F   | 49          | Elisabeth Blennow, Karolinska Institute | balanced   |
| CC0210    | 46,XY,t(11;22)(q23;q11)pat      | M   | 17          | ECACC                                   | balanced   |
| FY1199    | 46,XY,t(11;22)(q23;q11)         | M   | 60          | ECACC                                   | balanced   |
| GM06228   | 47,XX,+der(22)t(11;22)(q23;q11) | F   | 9 months    | Coriell                                 | unbalanced |
| DD1618    | 47,XX,+der(22)t(11;22)(q23;q11) | F   | 31          | ECACC                                   | unbalanced |
| BO2188    | 47,XY,+der(22)t(11;22)(q23;q11) | M   | 4 days      | ECACC                                   | unbalanced |
| GM14258   | 47,XY,+der(22)t(11;22)(q23;q11) | M   | 14          | Coriell                                 | unbalanced |
| GM12139   | Control (46,XX)                 | F   | 17          | Corriell                                | control    |
| GM07053   | Control (46,XX)                 | F   | 24          | Corriell                                | control    |
| GM12151   | Control (46,XX)                 | F   | 26          | Corriell                                | control    |
| GM07014   | Control (46,XX)                 | F   | 39          | Corriell                                | control    |
| GM07002   | Control (46,XX)                 | F   | 63          | Corriell                                | control    |
| GM10863   | Control (46,XX)                 | F   | 43          | Corriell                                | control    |
| GM06991   | Control (46,XX)                 | F   | 42          | Corriell                                | control    |
| GM07353   | Control (46,XY)                 | M   | 20          | Corriell                                | control    |
| GM07017   | Control (46,XY)                 | M   | 61          | Corriell                                | control    |
| GM13072   | Control (46,XX)                 | F   | 4           | Corriell                                | control    |
| GM11983   | Control (46,XX)                 | F   | 29          | Corriell                                | control    |
| GM11878   | Control (46,XY)                 | M   | 6           | Corriell                                | control    |
| GM07535   | Control (46,XY)                 | M   | 15          | Corriell                                | control    |

**Supplementary Table S2: Mapping of top-25 transcripts differentially expressed between Emanuel syndrome patients and controls**

Table showing the proportion of transcripts mapping to different chromosomes, as well as the expected and observed number of transcripts within the top 25 differentially expressed genes between Emanuel patients (unbalanced) and controls that map to those chromosomes.

**Table S2: Mapping of the top-25 transcripts differentially expressed between Emanuel syndrome patients and controls**

| Chromosome | Nb transcripts | Prop. | Expected | Found | Prop. | <i>P</i> value |
|------------|----------------|-------|----------|-------|-------|----------------|
| HSA1       | 4572           | 8.36  | 2.09     | 1     | 4     | 0.72           |
| HSA11      | 2574           | 4.71  | 1.18     | 5     | 20    | 0.01           |
| HSA21      | 599            | 1.1   | 0.27     | 0     | 0     | 1              |
| HSA22      | 1107           | 2.02  | 0.51     | 5     | 20    | 0.00029        |

## Supplementary Table S3: Genes and quantitative PCR assays

TableS3: Genes and quantitative PCR assays

| Gene            | Accession nb. | category/mapping | Fwd. primer ID    | Fwd. Primer sequence          | Rev. primer ID    | Rev. Primer sequence          |
|-----------------|---------------|------------------|-------------------|-------------------------------|-------------------|-------------------------------|
| <i>CBL</i>      | NM_005188.2   | 11q23.3          | <i>CBL_F</i>      | CACCACCACCACCACCAG            | <i>CBL_R</i>      | CAGCTTTGGGTTCTGACACA          |
| <i>ZNF202</i>   | NM_003455.2   | 11q23.3          | <i>ZNF202_F</i>   | GCGTCCACACCAGGAAGA            | <i>ZNF202_R</i>   | TCTCCAGAGCTCCTCTCTGTC         |
| <i>HINFP</i>    | NM_198971.1   | 11q23.3          | <i>MIZF_F</i>     | GCTACCACACCAAGCTGAAA          | <i>MIZF_R</i>     | CAGTGCTCCACAGACACA            |
| <i>TBRG1</i>    | NM_032811.2   | 11q24.2          | <i>TBRG1_F</i>    | TTCCAAGACAGACACGGAAG          | <i>TBRG1_R</i>    | AATCGGGCCTCTAGGAATCT          |
| <i>LMO7</i>     | NM_005358.5   | 13q22            | <i>LMO7_F</i>     | TCGGTGGTTCCTGATCTTC           | <i>LMO7_R</i>     | CAGTAGGCGGTCCTGCTC            |
| <i>HIRA</i>     | NM_003325     | 22q11.2          | <i>HIRA_F</i>     | CTGGGTCCGGTTCCTACTC           | <i>HIRA_R</i>     | CCTGACACTCGGTGAAGAGG          |
| <i>DGCR14</i>   | NM_022719.2   | 22q11.21         | <i>DGCR14_F</i>   | ACTGGAGTGGTGGGCAAC            | <i>DGCR14_R</i>   | GTAGCGGCTCAGGAAGACAT          |
| <i>COMT</i>     | NM_000754.3   | 22q11.21         | <i>COMT_F</i>     | AGAAGGAGTGGGCCATGA            | <i>COMT_R</i>     | GCACAGCTGAGTAGCCACAG          |
| <i>C22orf29</i> | NM_024627     | 22q11.21         | <i>C22orf29_F</i> | GGAGCAGAAGAGCACAGCTA          | <i>C22orf29_R</i> | GGTACCCAGCAGAAGTCCAC          |
| <i>NUDT3</i>    | NM_006703     | 6p21.2           | <i>NUDT3_F</i>    | AGCTCAAGTCGAACACAGACC         | <i>NUDT3_R</i>    | ATGGCGACTACTGCTCACG           |
| <i>GusB</i>     | NM_000181     | normalization    | <i>GusB_F</i>     | CCTGACTGACACCTCCAAGTATCCCAAGG | <i>GusB_R</i>     | AGTCAAAATATGTGTTCTGGACAAAGTAA |
| <i>DHSA</i>     | NM_004168.2   | normalization    | <i>DHSA_F</i>     | CCTAAAGCACCTGAAGACGTTCCGACCG  | <i>DHSA_R</i>     | AGGTCCGTGTTCCAGACCATT         |
| <i>TBP</i>      | NM_003194     | normalization    | <i>TBP_F</i>      | CCGCAGCAAACCGCTTGGGA          | <i>TBP_R</i>      | CGTGGCTCTCTTATCCTCATGA        |



**Supplementary Table S4: Mapping of top-25 transcripts differentially expressed between t(11;22) carriers and controls**

Table showing the proportion of transcripts mapping to different chromosomes, as well as the expected and observed number of transcripts within the top 25 differentially expressed genes between carriers of the balanced t(11;22) translocation and controls that map to those chromosomes.

**Table S4: Mapping of top-25 transcripts differentially expressed between t(11;22) carriers and controls**

| Chromosome | Nb transcripts | Prop. | Expected | Found | Prop. | <i>P</i> value |
|------------|----------------|-------|----------|-------|-------|----------------|
| HSA1       | 4572           | 8.36  | 2.09     | 3     | 12    | 0.47           |
| HSA11      | 2574           | 4.71  | 1.18     | 4     | 16    | 0.04           |
| HSA21      | 599            | 1.1   | 0.27     | 0     | 0     | 1              |
| HSA22      | 1107           | 2.02  | 0.51     | 0     | 0     | 1              |

**Supplementary Table S5: List of genes and differentially expressed between t(11;22) carriers and controls and mapping to HSA11 or HSA22**

Table listing the top-50 most differentially expressed genes between carriers of the balanced t(11;22) translocation (B) and controls (C) that map to HSA11 or HSA22, as well as their ranking in the complete list of differentially expressed genes.

| Rank in Top 11/22 list | Affymetrix ID | Gene Symbol                           | Chromosomal Location | Mapping         | Rank in C vs B list |
|------------------------|---------------|---------------------------------------|----------------------|-----------------|---------------------|
| 1                      | 231837_at     | <i>USP28</i>                          | chr11q23             | HSA11 to der 11 | 8                   |
| 2                      | 241610_x_at   | <i>PACS1</i>                          | chr11q13.1           | HSA11 to der 11 | 9                   |
| 3                      | 230306_at     | <i>VPS26B</i>                         | chr11q25             | HSA11 to der22  | 20                  |
| 4                      | 210102_at     | <i>VWA5A</i>                          | chr11q23             | HSA11 to der22  | 16                  |
| 5                      | 1552678_a_at  | <i>USP28</i>                          | chr11q23             | HSA11 to der 11 | 29                  |
| 6                      | 1554360_at    | <i>FCHSD2</i>                         | chr11q13.4           | HSA11 to der 11 | 70                  |
| 7                      | 244418_at     | <i>RTN3</i>                           | chr11q13             | HSA11 to der 11 | 78                  |
| 8                      | 212516_at     | <i>ARAP1</i>                          | chr11q13.4           | HSA11 to der 11 | 92                  |
| 9                      | 235010_at     | <i>LOC729013</i>                      | chr11p15.3           | HSA11 to der 11 | 105                 |
| 10                     | 226285_at     | <i>CAPRIN1</i>                        | chr11p13             | HSA11 to der 11 | 126                 |
| 11                     | 222599_s_at   | <i>NAV2</i>                           | chr11p15.1           | HSA11 to der 11 | 159                 |
| 12                     | 216171_at     | <i>EEF1G</i>                          | chr11q12.3           | HSA11 to der 11 | 188                 |
| 13                     | 222807_at     | <i>C11orf30</i>                       | chr11q13.5           | HSA11 to der 11 | 195                 |
| 14                     | 242106_at     | <i>MAPK1</i>                          | chr22q11.2           | HSA22 to der 11 | 150                 |
| 15                     | 215241_at     | <i>ANO3</i>                           | chr11p14.2           | HSA11 to der 11 | 355                 |
| 16                     | 228142_at     | <i>UQCR10</i>                         | chr22cen-q12.3       | HSA22 to der 11 | 308                 |
| 17                     | 235865_at     | <i>CELF1</i>                          | chr11p11             | HSA11 to der 11 | 264                 |
| 18                     | 218114_at     | <i>GGA1</i>                           | chr22q13.31          | HSA22 to der 11 | 335                 |
| 19                     | 635_s_at      | <i>PPP2R5B</i>                        | chr11q12-q13         | HSA11 to der 11 | 372                 |
| 20                     | 220998_s_at   | <i>UNC93B1</i>                        | chr11q13             | HSA11 to der 11 | 367                 |
| 21                     | 207180_s_at   | <i>HTATIP2</i>                        | chr11p15.1           | HSA11 to der 11 | 384                 |
| 22                     | 217185_s_at   | <i>ZNF259 / LOC442240</i>             | chr11q23.3           | HSA11 to der 11 | 255                 |
| 23                     | 212421_at     | <i>C22orf9</i>                        | chr22q13.31          | HSA22 to der 11 | 269                 |
| 24                     | 223172_s_at   | <i>MTP18</i>                          | chr22q               | HSA22 to der 11 | 241                 |
| 25                     | 221845_s_at   | <i>CLPB</i>                           | chr11q13.4           | HSA11 to der 11 | 389                 |
| 26                     | 227925_at     | <i>LOC644563 / C6orf51 / FLJ39051</i> | chr11q24.2           | HSA11 to der22  | 295                 |
| 27                     | 204156_at     | <i>SIK3</i>                           | chr11q23.3           | HSA11 to der22  | 533                 |
| 28                     | 208745_at     | <i>ATP5L</i>                          | chr11q23.3           | HSA11 to der22  | 438                 |
| 29                     | 208291_s_at   | <i>TH</i>                             | chr11p15.5           | HSA11 to der 11 | 621                 |
| 30                     | 229965_at     | <i>PIK4CA</i>                         | chr22q11.21          | HSA22 to der 11 | 578                 |
| 31                     | 200084_at     | <i>C11orf58</i>                       | chr11p15.1           | HSA11 to der 11 | 557                 |
| 32                     | 227086_at     | <i>HIRA</i>                           | chr22q11.2           | HSA22 to der 22 | 615                 |
| 33                     | 218327_s_at   | <i>SNAP29</i>                         | chr22q11.21          | HSA22 to der 11 | 624                 |
| 34                     | 214381_at     | <i>LOC441601</i>                      | chr11p11.12          | HSA11 to der 11 | 597                 |
| 35                     | 225744_at     | <i>ZDHHHC8</i>                        | chr22q11.21          | HSA22 to der 22 | 563                 |
| 36                     | 1558613_at    | <i>OAF</i>                            | chr11q23.3           | HSA11 to der22  | 535                 |
| 37                     | 220470_at     | <i>BET1L</i>                          | chr11p15.5           | HSA11 to der 11 | 519                 |

|           |              |                           |                  |                 |             |
|-----------|--------------|---------------------------|------------------|-----------------|-------------|
| <b>38</b> | 213897_s_at  | <i>MRPL23</i>             | chr11p15.5-p15.4 | HSA11 to der 11 | <b>502</b>  |
| <b>39</b> | 1566958_at   | <i>GAB2</i>               | chr11q14.1       | HSA11 to der 11 | <b>444</b>  |
| <b>40</b> | 1569022_a_at | <i>PIK3C2A</i>            | chr11p15.5-p14   | HSA11 to der 11 | <b>426</b>  |
| <b>41</b> | 211725_s_at  | <i>BID</i>                | chr22q11.1       | HSA22 to der 22 | <b>600</b>  |
| <b>42</b> | 206580_s_at  | <i>EFEMP2</i>             | chr11q13         | HSA11 to der 11 | <b>499</b>  |
| <b>43</b> | 1566959_at   | <i>GAB2</i>               | chr11q14.1       | HSA11 to der 11 | <b>579</b>  |
| <b>44</b> | 212203_x_at  | <i>IFITM3</i>             | chr11p15.5       | HSA11 to der 11 | <b>634</b>  |
| <b>45</b> | 1562283_at   | <i>MAPK1</i>              | chr22q11.2       | HSA22 to der 11 | <b>657</b>  |
| <b>46</b> | 208810_at    | <i>DNAJB6 / LOC387820</i> | chr11q24.2       | HSA11 to der22  | <b>679</b>  |
| <b>47</b> | 222268_x_at  | <i>LOC649768 / MUC5B</i>  | chr11p15.5       | HSA11 to der 11 | <b>825</b>  |
| <b>48</b> | 235062_at    | <i>LOC120379</i>          | chr11q23.1       | HSA11 to der 11 | <b>779</b>  |
| <b>49</b> | 1568939_at   | <i>OR8B3</i>              | chr11q24.2       | HSA11 to der22  | <b>904</b>  |
| <b>50</b> | 236059_at    | <i>C11orf61</i>           | chr11q24.2       | HSA11 to der22  | <b>1010</b> |
